# Supplementary material for: A New Hydroxychavicol Dimer from the Roots of Piper betle
Source: MDPI journal article supplement (doi:10.3390/molecules18032563), 2013-02-26

# Supplementary Materials

Figure 1-1.  $^1\text{H-NMR}$  of compound 1.

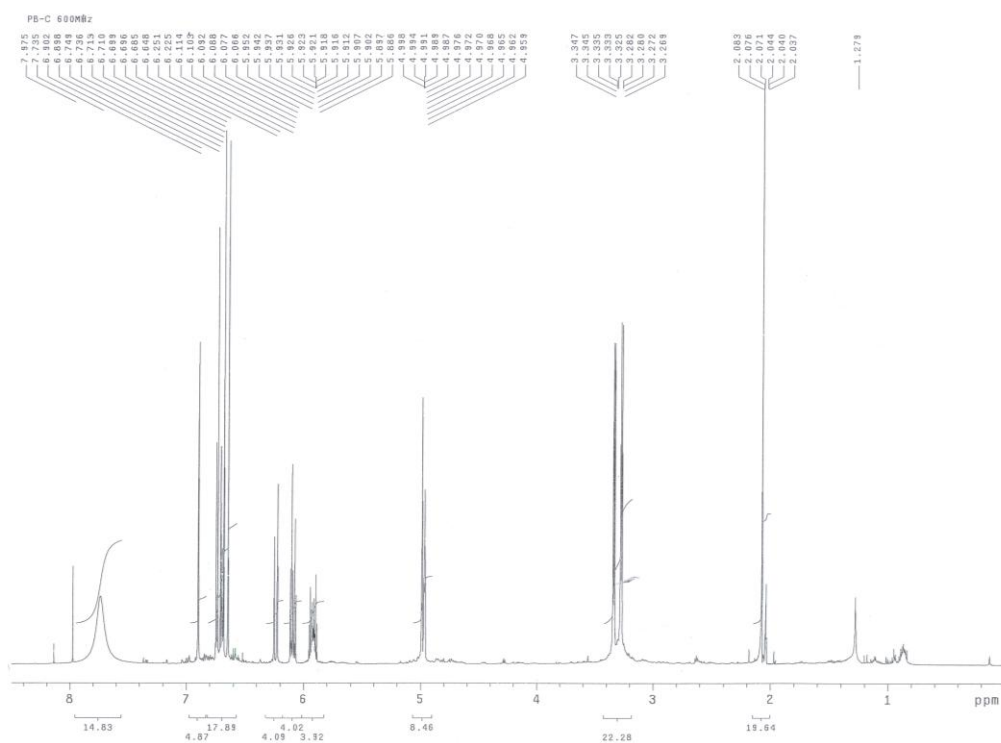

Figure 1-2.  $^{13}\text{C-NMR}$  of compound 1.

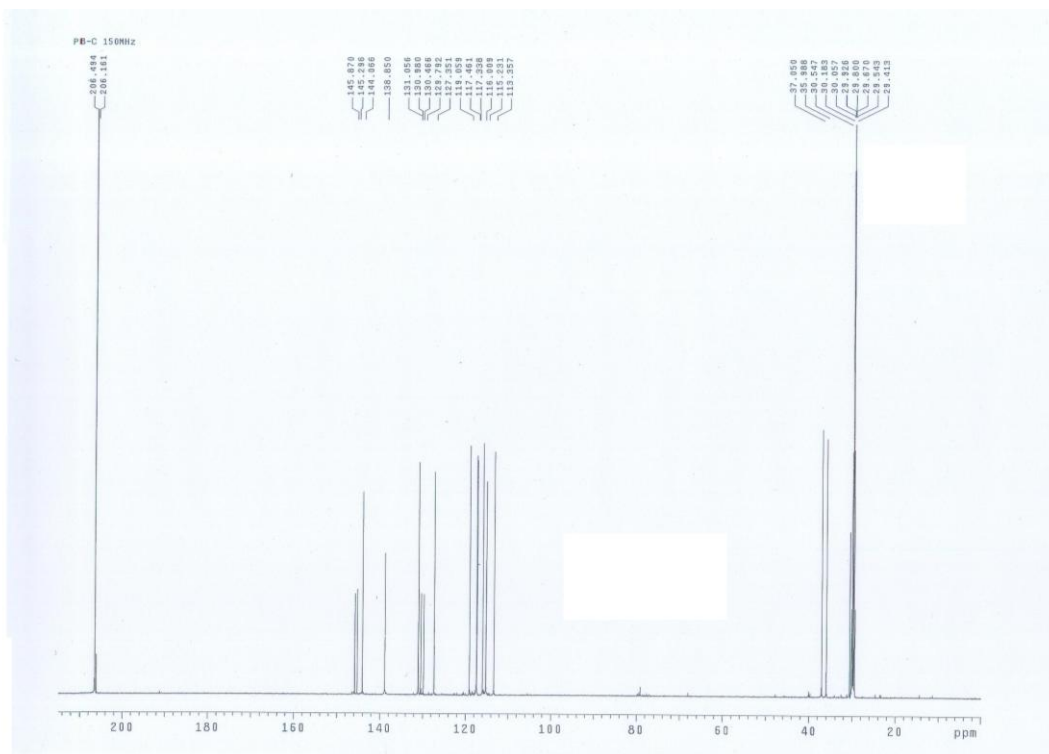

Figure 1-3.  $^1\text{H}$ - $^1\text{H}$  COSY of compound 1.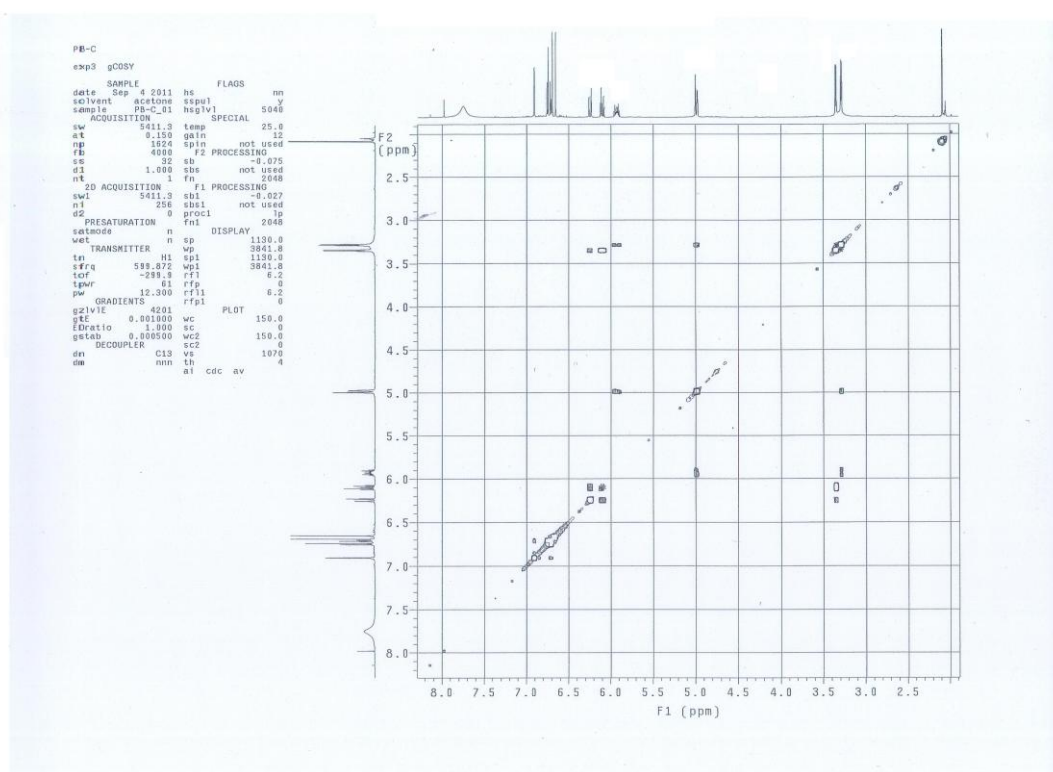

Figure 1-4. HMBC of compound 1.

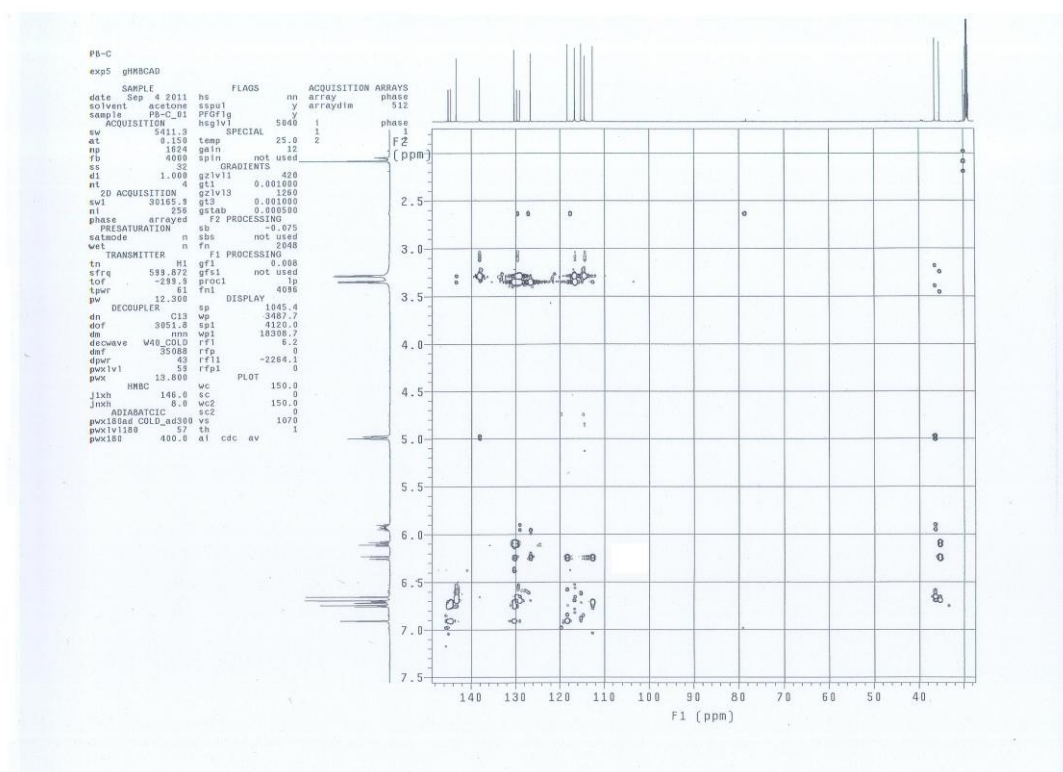

Figure 1-5. EIMS of compound 1.

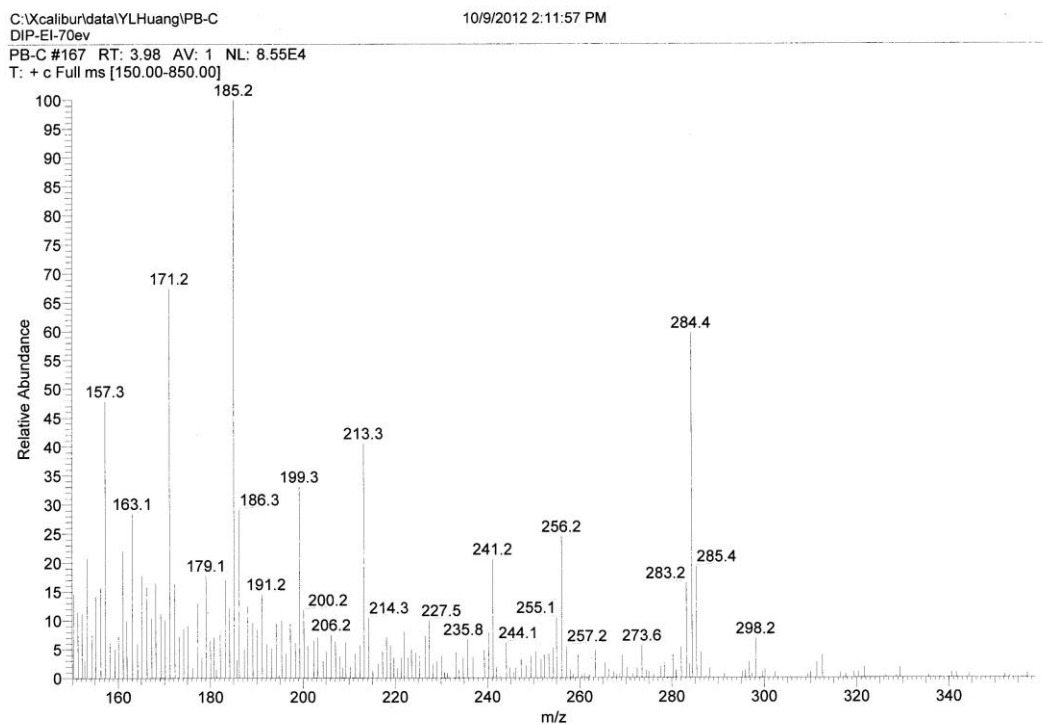

Figure 1-6. HRMS data of compound 1.

```

LIST: hei6573_pbc-c7 21-Nov-12 REG : 00:31.2 #9
Samp: EI +VE +LMR ESCAN (EXP) UP HR NRM Start : 11:02:35 3150
Mode: Inlet :
Oper:
Limit: ( 0)
Peak: (553) C36.H41.O5
Data: 1000.00 mmu R+D: -2.0 > 60.0
      +/90>120 (CMASS : converted; CMASS : converted; CMASS : conver

```

| Mass     | Intensity | %RA  | Flags | Delta (mmu) | R+D  | Composition |
|----------|-----------|------|-------|-------------|------|-------------|
| 298.1216 | 2215      | 9.43 | #     | -1.0        | 10.0 | C18.H18.O4  |

Figure 2-1. <sup>1</sup>H-NMR of compound 2.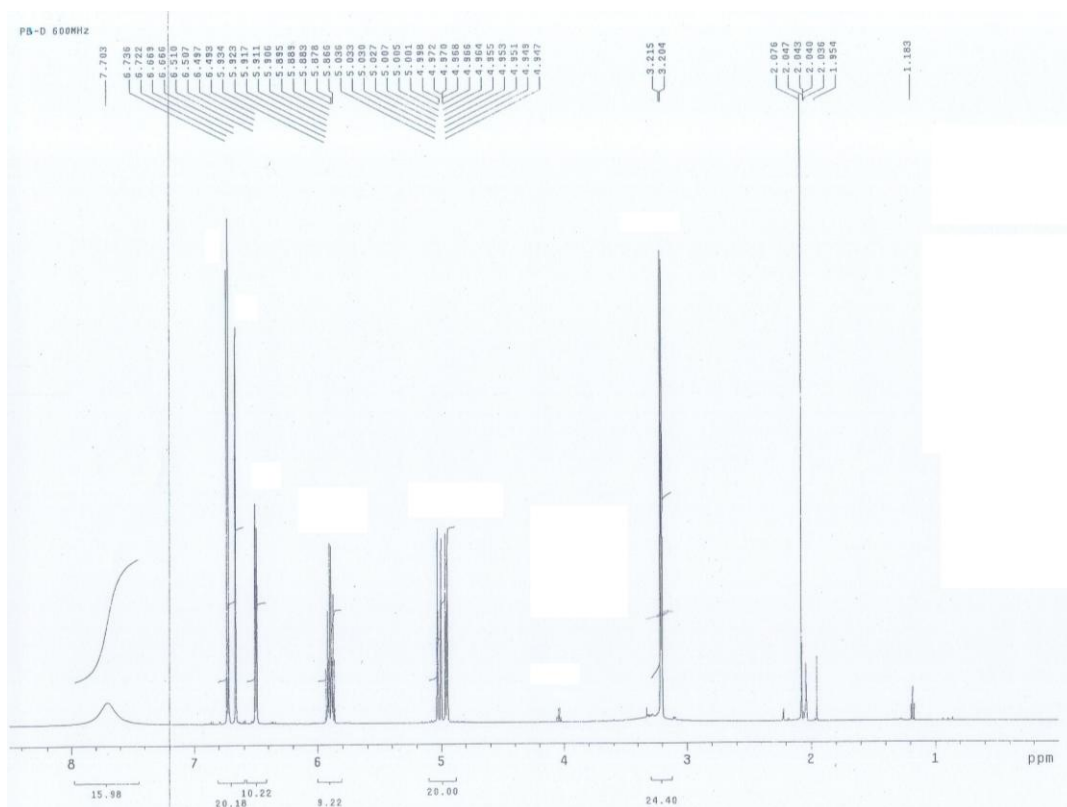Figure 2-2. <sup>13</sup>C-NMR of compound 2.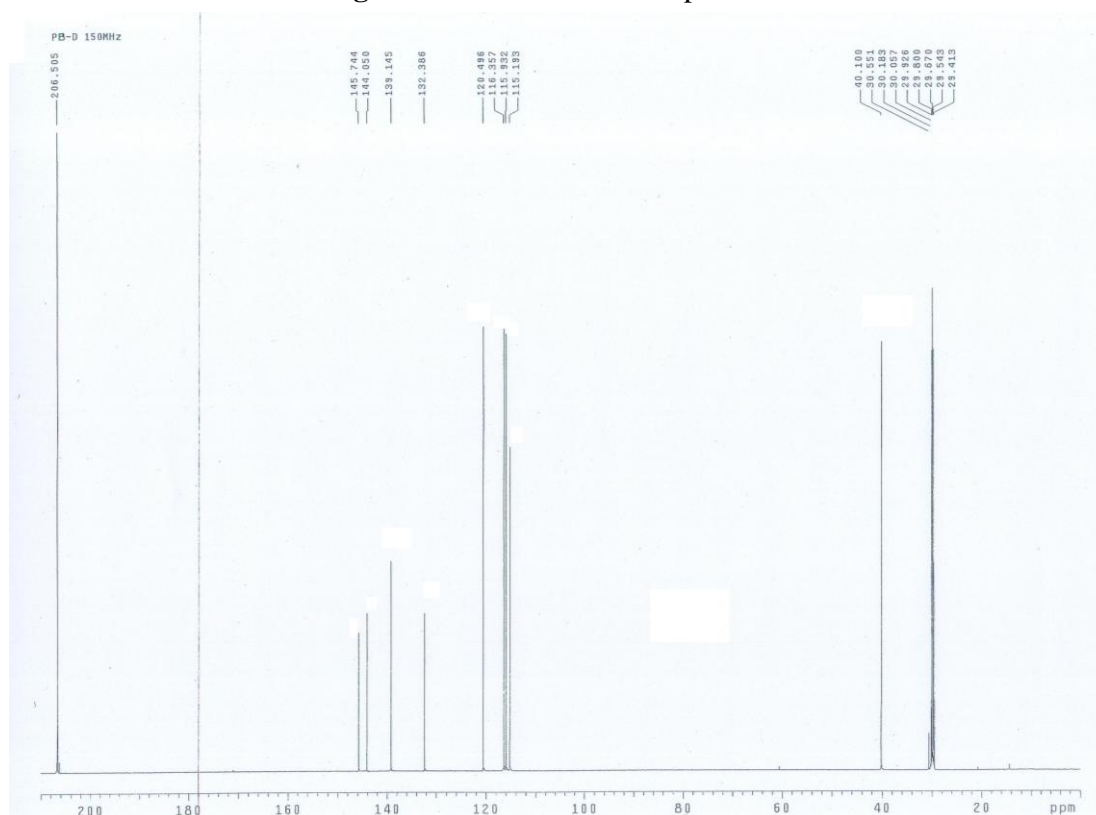

Figure 2-3. EIMS of compound 2.

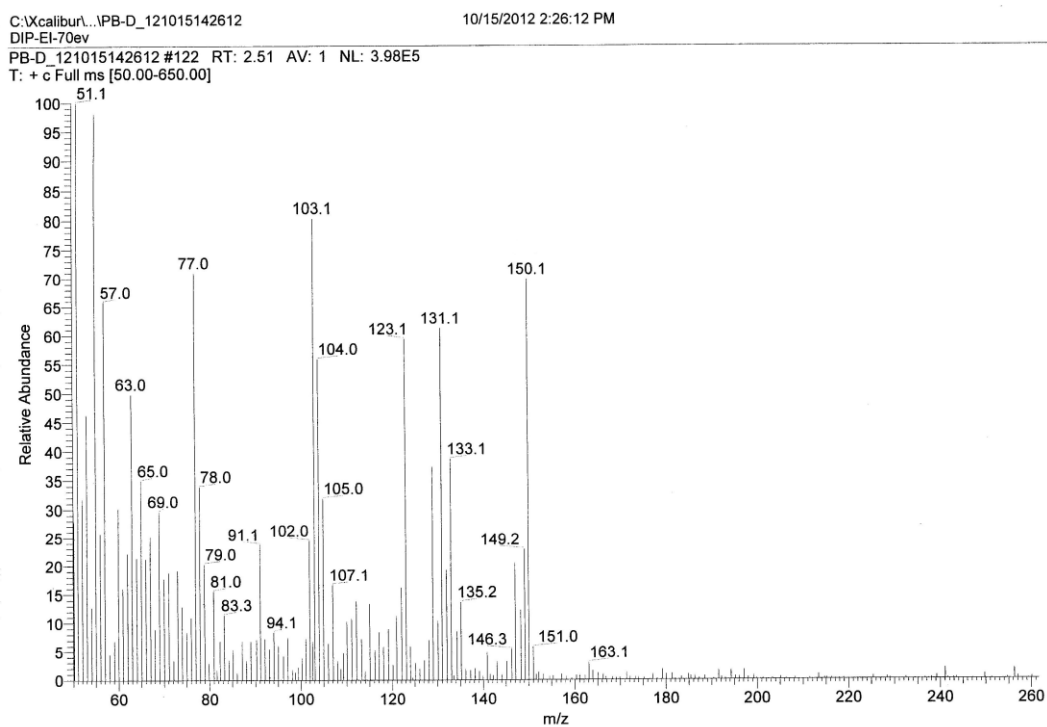Figure 3-1. <sup>1</sup>H-NMR of compound 3.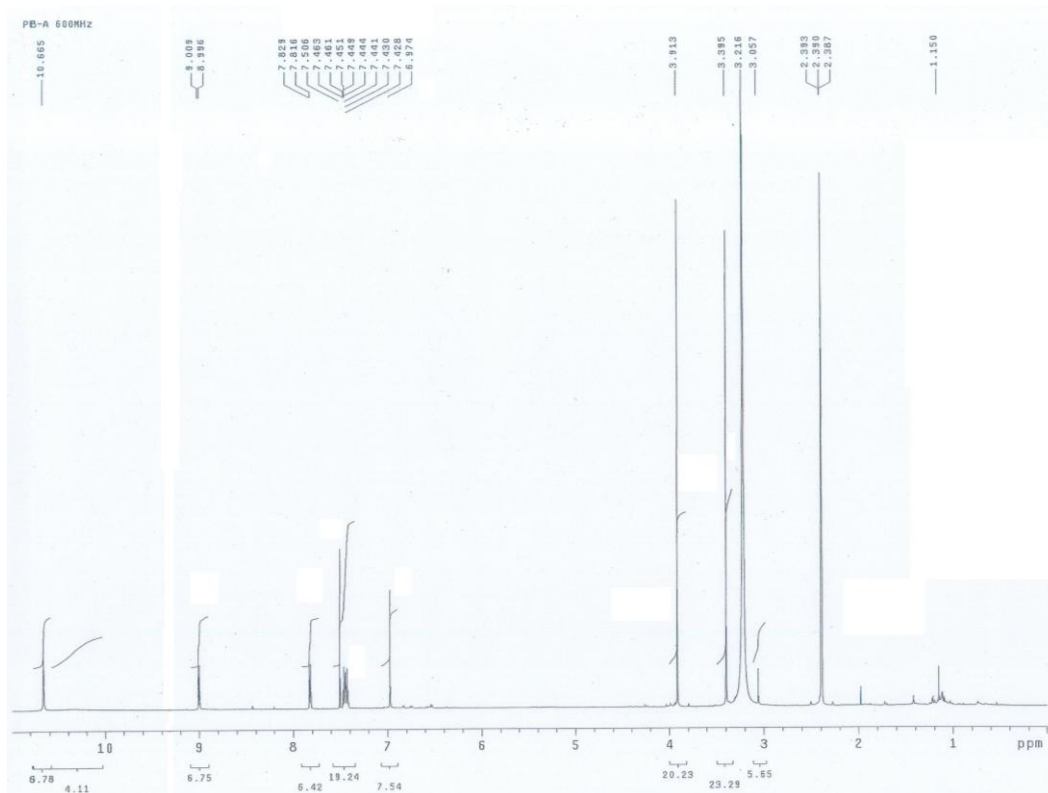

Supplement: s1 [file s1]
